# Supplementary material
Source: PubMed Central journal article supplement (PMC6583016)
Supplement: jamapediatr-e183115-s001.pdf [file jamapediatr-e183115-s001.pdf]

## Supplementary Online Content

Bornehag C-G, Lindh C, Reichenberg A, et al. Association of prenatal phthalate exposure with language development in early childhood. *JAMA Pediatr*. Published online October 29, 2018. doi: 10.1001/jamapediatrics.2018.3115

**eTable 1.** Distribution of Concentration (ng/mL) of Urinary Phthalate Metabolites in SELMA and TIDES

**eTable 2.** Description of the Study Populations in SELMA and TIDES: Analysis Subset Compared to Not Included Population

This supplementary material has been provided by the authors to give readers additional information about their work.

**eTable 1.** Distribution of Concentration (ng/mL) of Urinary Phthalate Metabolites in SELMA and TIDES

| Parent compound | Metabolite <sup>1)</sup> | (Unadjusted) concentration of phthalate metabolites <sup>1)</sup> (ng/mL) |      |       |       |                   |      |      |       |
|-----------------|--------------------------|---------------------------------------------------------------------------|------|-------|-------|-------------------|------|------|-------|
|                 |                          | SELMA (N=963)                                                             |      |       |       | TIDES (N=370)     |      |      |       |
|                 |                          | GM (95% CI)                                                               | 50%  | 75%   | 95%   | GM (95% CI)       | 50%  | 75%  | 95%   |
| DEP             | MEP                      | 67.6 (62.9, 74.6)                                                         | 62.2 | 143.0 | 425.7 | 25.7 (22.1, 30.0) | 25.0 | 64.8 | 366.0 |
| DBP             | MBP <sup>2)</sup>        | 69.4 (66.0, 74.6)                                                         | 72.3 | 116.4 | 222.3 | 6.5 (5.6, 7.4)    | 7.0  | 18.0 | 47.0  |
|                 | MiBP                     |                                                                           |      |       |       | 4.0 (3.4, 4.5)    | 4.3  | 11.0 | 31.5  |
| BBzP            | MBzP                     | 16.1 (15.1, 17.2)                                                         | 15.9 | 33.0  | 91.9  | 3.4 (3.0, 4.0)    | 3.2  | 8.0  | 39.4  |
| DiDP/DPHP       | MHIDP                    | 1.3 (1.2, 1.4)                                                            | 1.3  | 2.3   | 6.4   |                   |      |      |       |
| DiDP/DPHP       | MCiNP                    | 0.7 (0.67, 0.75)                                                          | 0.7  | 1.1   | 2.9   |                   |      |      |       |
| DEHP            | MEHP                     | 3.8 (3.6, 4.1)                                                            | 3.8  | 6.7   | 16.2  | 1.9 (1.7, 2.2)    | 2.0  | 4.3  | 17.0  |
|                 | MEHHP                    | 16.8 (15.8, 17.8)                                                         | 16.5 | 28.4  | 70.2  | 6.0 (5.2, 6.9)    | 6.0  | 13.8 | 58.5  |
|                 | MEOHP                    | 11.4 (10.7, 12.1)                                                         | 11.2 | 19.6  | 50.4  | 4.3 (3.7, 4.9)    | 4.1  | 9.6  | 39.0  |
|                 | MECPP                    | 16.3 (15.4, 17.2)                                                         | 15.7 | 26.6  | 68.5  | 8.1 (7.1, 9.2)    | 8.5  | 17.2 | 64.9  |
|                 | MCMHP                    | 6.5 (6.1, 6.8)                                                            | 5.9  | 10.2  | 31.3  |                   |      |      |       |

1. Metabolite concentrations were not measured in cells without entries

2. In SELMA, only MBP (but not MiBP) was measured; In TIDES MnBP (shown here as MBP) and MiBP were measured

**eTable 2.** Description of the Study Populations in SELMA and TIDES: Analysis Subset Compared to Not Included Population

| Study                                                 | SELMA                      |                                               |                      | TIDES                      |                                               |                      |
|-------------------------------------------------------|----------------------------|-----------------------------------------------|----------------------|----------------------------|-----------------------------------------------|----------------------|
|                                                       | Subset in analysis (N=963) | Children not included in the analyses (N=728) | p-value <sup>1</sup> | Subset in analysis (N=370) | Children not included in the analyses (N=369) | p-value <sup>1</sup> |
| Boys (%)                                              | 52.8                       | 52.6                                          | 0.935                | 50.0                       | 49.0                                          | 0.786                |
| Premature birth (<37 weeks) (%)                       | 4.6                        | 6.2                                           | 0.146                | 10.4                       | 5.4                                           | 0.012                |
| Mother completed university (%)                       | 65.3                       | 57.1                                          | 0.001                | 76.5                       | 72.5                                          | 0.622                |
| Mother smoked at study entry (%)                      | 5.3                        | 6.6                                           | 0.260                | 6.2                        | 5.4                                           | 0.642                |
| Mother white/non-Hispanic (%)                         | 100                        | 100                                           | 1.000                | 74.0                       | 82.0                                          | 0.009                |
| Mother's weight at study entry (mean in kg)           | 70.0                       | 69.0                                          | 0.658                | 71.5                       | 68.5                                          | 0.374                |
| Gestational age at urine collection (median in weeks) | 10.0                       | 10.0                                          | 1.000                | 10.9                       | 11.0                                          | 0.965                |

1. P-values for t-test
